# Supplementary material
Source: PubMed Central journal article supplement (PMC9974563)
Supplement: NIHMS1838155-supplement-1.pdf [file NIHMS1838155-supplement-1.pdf]

**Figure S1: Study population, the Atherosclerosis Risk in Communities Study cohort, visit 5 (ages 67-90 years during 2011-2013).**

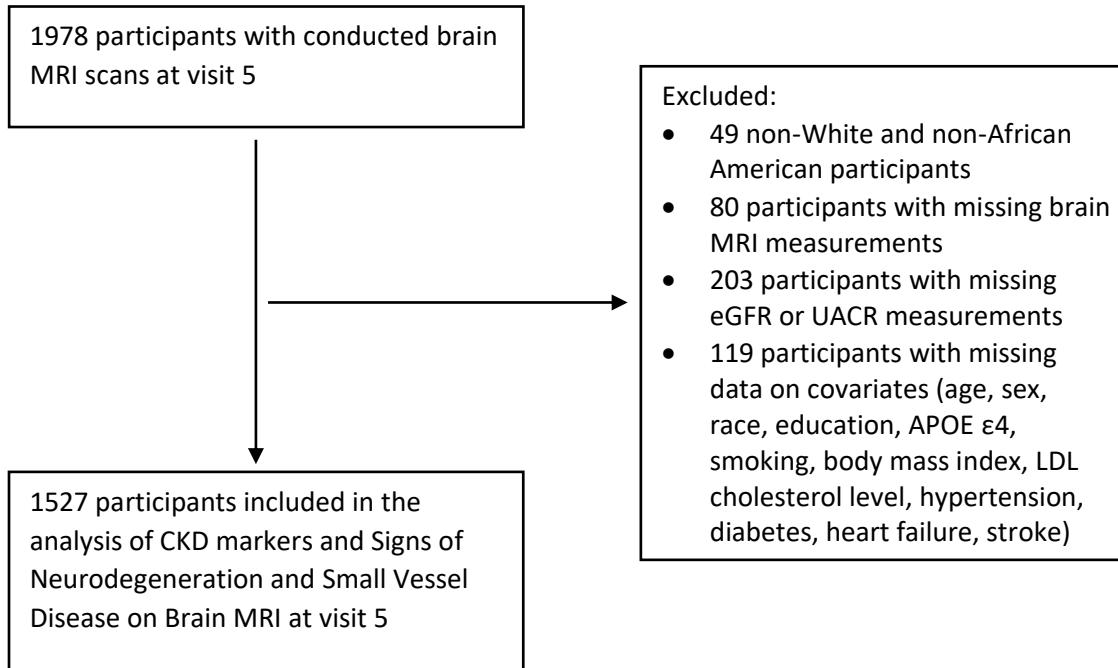

**Table S1: Associations (95% confidence interval) of estimated glomerular filtration rate (eGFR) with brain pathological changes, the Atherosclerosis Risk in Communities Study cohort, visit 5 (ages 67-90 years during 2011-2013). Comparison of eGFR estimations based on creatinine, creatinine and cystatin-C, and beta-2-microglobulin (B2M). Models using inverse probability weighting to account for the selection of participants invited for magnetic resonance imaging (MRI) scans.**

| Brain MRI sign                                             | eGFR Creatinine <sup>a</sup> ,<br>per 1-IQR<br>(25.35 ml/min/1.73m <sup>2</sup> ) decrease |         | eGFR Creatinine + Cystatin-C <sup>b</sup> ,<br>per 1-IQR<br>(25.74 ml/min/1.73m <sup>2</sup> ) decrease |         | eGFR Beta-2-microglobulin <sup>c</sup> ,<br>per 1-IQR<br>(19.08 ml/min/1.73m <sup>2</sup> ) decrease |         |
|------------------------------------------------------------|--------------------------------------------------------------------------------------------|---------|---------------------------------------------------------------------------------------------------------|---------|------------------------------------------------------------------------------------------------------|---------|
|                                                            | Effect Estimate <sup>d</sup>                                                               | P value | Effect Estimate <sup>d</sup>                                                                            | P value | Effect Estimate <sup>d</sup>                                                                         | P value |
| <b>Brain volume</b>                                        | Standardized Regression Coefficient                                                        |         | Standardized Regression Coefficient                                                                     |         | Standardized Regression Coefficient                                                                  |         |
| Total brain [cm <sup>3</sup> ]                             | -0.05 (-0.09 to -0.01)                                                                     | 0.02    | -0.05 (-0.09 to -0.01)                                                                                  | 0.006   | -0.07 (-0.10 to -0.03)                                                                               | <0.001  |
| Total cortex [cm <sup>3</sup> ]                            | -0.07 (-0.11 to -0.02)                                                                     | 0.003   | -0.07 (-0.11 to -0.03)                                                                                  | 0.001   | -0.10 (-0.13 to -0.06)                                                                               | <0.001  |
| Temporal lobe meta-ROI [cm <sup>3</sup> ]                  | -0.07 (-0.12 to -0.01)                                                                     | 0.01    | -0.06 (-0.11 to -0.01)                                                                                  | 0.03    | -0.07 (-0.12 to -0.02)                                                                               | 0.006   |
| Cortex excluding temporal lobe meta-ROI [cm <sup>3</sup> ] | -0.07 (-0.11 to -0.02)                                                                     | 0.003   | -0.07 (-0.11 to -0.03)                                                                                  | 0.001   | -0.10 (-0.14 to -0.06)                                                                               | <0.001  |
| <b>Brain infarcts</b>                                      | Odds Ratio                                                                                 |         | Odds Ratio                                                                                              |         | Odds Ratio                                                                                           |         |
| Infarcts (any)                                             | 1.09 (0.90 to 1.33)                                                                        | 0.4     | 1.14 (0.95 to 1.38)                                                                                     | 0.2     | 1.15 (0.97 to 1.37)                                                                                  | 0.1     |
| Cortical Infarcts                                          | 0.95 (0.71 to 1.26)                                                                        | 0.7     | 0.93 (0.72 to 1.21)                                                                                     | 0.6     | 0.91 (0.72 to 1.15)                                                                                  | 0.5     |
| Lacunar Infarcts                                           | 1.12 (0.90 to 1.39)                                                                        | 0.3     | 1.20 (0.98 to 1.47)                                                                                     | 0.08    | 1.28 (1.05 to 1.55)                                                                                  | 0.01    |
| <b>Brain micro-hemorrhages</b>                             | Odds Ratio                                                                                 |         | Odds Ratio                                                                                              |         | Odds Ratio                                                                                           |         |
| Micro-hemorrhages (any)                                    | 1.03 (0.85 to 1.25)                                                                        | 0.8     | 1.05 (0.87 to 1.25)                                                                                     | 0.6     | 1.11 (0.94 to 1.32)                                                                                  | 0.2     |
| Lobar micro-hemorrhages                                    | 1.19 (0.87 to 1.61)                                                                        | 0.3     | 1.17 (0.88 to 1.56)                                                                                     | 0.3     | 1.20 (0.92 to 1.57)                                                                                  | 0.2     |
| Subcortical micro-hemorrhages                              | 0.92 (0.75 to 1.12)                                                                        | 0.4     | 0.96 (0.80 to 1.16)                                                                                     | 0.7     | 1.06 (0.89 to 1.26)                                                                                  | 0.5     |
| <b>White matter lesions</b>                                | Standardized Regression Coefficient                                                        |         | Standardized Regression Coefficient                                                                     |         | Standardized Regression Coefficient                                                                  |         |
| Log-WMH volume [cm <sup>3</sup> ]                          | 0.04 (-0.03 to 0.12)                                                                       | 0.3     | 0.06 (-0.01 to 0.13)                                                                                    | 0.08    | 0.08 (0.02 to 0.15)                                                                                  | 0.01    |
| Fractional anisotropy                                      | -0.11 (-0.19 to -0.03)                                                                     | 0.01    | -0.10 (-0.18 to -0.03)                                                                                  | 0.007   | -0.10 (-0.17 to -0.03)                                                                               | 0.007   |
| Mean diffusivity [10 <sup>-4</sup> mm <sup>2</sup> /s]     | 0.07 (-0.01 to 0.15)                                                                       | 0.09    | 0.05 (-0.02 to 0.13)                                                                                    | 0.2     | 0.07 (0.00 to 0.14)                                                                                  | 0.06    |

a. Creatinine-based estimated glomerular filtration rate (eGFR) using the 2021 CKD Epidemiology Collaboration (CKD-EPI) equation.

b. Creatinine- and cystatin-C-based eGFR using the 2021 CKD-EPI equation.

c. Beta-2-microglobulin (B2M)-based estimated eGFR.

d. Models adjusted for age, sex, race, education, APOE  $\epsilon$ 4, smoking, body mass index, LDL cholesterol level, hypertension, diabetes, heart failure, stroke, and log urine albumin-creatinine-ratio (log-UACR). Continuous outcomes were standardized prior to regression to have a mean of 0 and standard deviation of 1. For brain volume measurements and log white matter hyperintensity volume (log-WMH), models were further adjusted for total intracranial volume.

**Table S2: Interaction terms (95% confidence interval) of estimated glomerular filtration rate (eGFR cystatin-C) and race as well as log urine albumin-creatinine-ratio (log-UACR) and race, the Atherosclerosis Risk in Communities Study cohort, visit 5 (ages 67-90 years during 2011-2013). Models using inverse probability weighting to account for the selection of participants invited for magnetic resonance imaging (MRI) scans.**

| <b>Brain MRI sign</b>                                      | <b>Interaction term<br/>eGFR and race</b> | <b>P value</b> | <b>Interaction term<br/>log-UACR and race</b> | <b>P value</b> |
|------------------------------------------------------------|-------------------------------------------|----------------|-----------------------------------------------|----------------|
| <b>Brain volume</b>                                        | Regression Coefficient                    |                | Regression Coefficient                        |                |
| Total brain [cm <sup>3</sup> ]                             | 0.02 (-0.05 to 0.09)                      | 0.6            | 0.01 (-0.03 to 0.06)                          | 0.5            |
| Total cortex [cm <sup>3</sup> ]                            | 0.05 (-0.04 to 0.13)                      | 0.3            | 0.00 (-0.04 to 0.05)                          | 0.9            |
| Temporal lobe meta-ROI [cm <sup>3</sup> ]                  | -0.03 (-0.13 to 0.07)                     | 0.6            | 0.01 (-0.04 to 0.07)                          | 0.6            |
| Cortex excluding temporal lobe meta-ROI [cm <sup>3</sup> ] | 0.06 (-0.02 to 0.15)                      | 0.2            | 0.00 (-0.04 to 0.05)                          | 0.9            |
| <b>Brain infarcts</b>                                      | Odds Ratio                                |                | Odds Ratio                                    |                |
| Infarcts (any)                                             | 0.86 (0.60 to 1.24)                       | 0.4            | 0.95 (0.76 to 1.18)                           | 0.6            |
| Cortical Infarcts                                          | 0.80 (0.48 to 1.33)                       | 0.4            | 0.79 (0.60 to 1.06)                           | 0.1            |
| Lacunar Infarcts                                           | 0.95 (0.63 to 1.41)                       | 0.8            | 0.95 (0.75 to 1.20)                           | 0.7            |
| <b>Brain micro-hemorrhages</b>                             | Odds Ratio                                |                | Odds Ratio                                    |                |
| Micro-hemorrhages (any)                                    | 1.14 (0.80 to 1.65)                       | 0.7            | 1.11 (0.89 to 1.37)                           | 0.4            |
| Lobar micro-hemorrhages                                    | 0.99 (0.55 to 1.77)                       | 0.9            | 0.94 (0.70 to 1.27)                           | 0.7            |
| Subcortical micro-hemorrhages                              | 1.33 (0.92 to 1.96)                       | 0.1            | 1.20 (0.95 to 1.51)                           | 0.1            |
| <b>White matter lesions</b>                                | Regression Coefficient                    |                | Regression Coefficient                        |                |
| Log-WMH volume [cm <sup>3</sup> ]                          | 0.00 (-0.14 to 0.13)                      | 0.9            | 0.00 (-0.09 to 0.08)                          | 0.9            |
| Fractional anisotropy                                      | 0.01 (-0.15 to 0.16)                      | 0.9            | -0.03 (-0.13 to 0.07)                         | 0.6            |
| Mean diffusivity [10 <sup>-4</sup> mm <sup>2</sup> /s]     | 0.10 (-0.05 to 0.26)                      | 0.2            | -0.06 (-0.15 to 0.03)                         | 0.2            |
